# Supplementary material
Source: PubMed Central journal article supplement (PMC10493865)
Supplement: jama-e2316029-s002.pdf [file jama-e2316029-s002.pdf]

## Supplemental Online Content

Laffin LJ, Rodman D, Luther JM, et al; Target-HTN Investigators. Aldosterone synthase inhibition with lorundrostat for uncontrolled hypertension. *JAMA*. Published online September 10, 2023. doi:10.1001/jama.2023.16029

### Target-HTN Sites

**eTable 1.** Select pre-specified analysis of factors anticipated to impact blood pressure lowering response to lorundrostat in cohort 1

**eTable 2.** Change in pharmacodynamic biomarkers compared with baseline

**eTable 3.** Observed 24-hour ambulatory blood pressure changes among all cohort 1 participants

**eTable 4.** Observed 24-hour ambulatory blood pressure changes among cohort 1 participants with baseline 24-hour mean systolic blood pressure >130 mm Hg

**eFigure 1.** Study design schema

**eFigure 2.** Weekly automated office systolic blood pressure changes with lorundrostat

**eFigure 3.** Proportion of participants with automated office blood pressure <130/80 mmHg at week 8 compared with baseline among cohort 1 participants

**eFigure 4.** Cosyntropin-stimulated cortisol production after 8 weeks of lorundrostat treatment

This supplemental material has been provided by the authors to give readers additional information about their work.

## Target-HTN Sites

| Institution                                   | Number of participants randomized | Institution                              | Number of participants randomized |
|-----------------------------------------------|-----------------------------------|------------------------------------------|-----------------------------------|
| RC Health Concepts                            | 2                                 | Northwest Heart Clinical Research        | 0                                 |
| Lundquist Institute                           | 1                                 | Vanderbilt                               | 2                                 |
| Jefferson City Medical Group                  | 0                                 | Clinical Research of West Florida, Inc.  | 2                                 |
| PRX Research                                  | 0                                 | WR-ClinSearch                            | 1                                 |
| Finlay Medical Research Corp                  | 28                                | Ace Clinical Research Group              | 6                                 |
| Grace Research                                | 0                                 | Holston Medical Group, P.C.              | 0                                 |
| Javara Research                               | 4                                 | Orange County Research Center, Inc.      | 0                                 |
| Clinical Research of West Florida - Corporate | 3                                 | Carolina Institute for Clinical Research | 2                                 |
| Grace Research                                | 2                                 | Next Phase Research                      | 0                                 |
| WR-Global Medical Research                    | 0                                 | Andres Patron                            | 6                                 |
| Clinical Research of South Nevada             | 4                                 | Medication Management, LLC               | 0                                 |
| Burke Primary Care                            | 3                                 | Vitae Research Center                    | 7                                 |
| M3 Wake Research, Inc.                        | 1                                 | Finlay Medical Research Corp             | 47                                |
| Louisiana Heart Center                        | 0                                 | AMR Coral Gables/Miami                   | 2                                 |
| Houston Methodist Hospital                    | 2                                 | Queens Hospital Medical Center           | 1                                 |
| Javara - Privia Medical Group Georgia         | 3                                 | Health Awareness, Inc.                   | 1                                 |
| Javara Inc.                                   | 0                                 | Sundance Clinical Research               | 0                                 |
| Javara Inc.                                   | 1                                 | Clinical Trials Research                 | 3                                 |
| Suncoast Research Group, LLC                  | 10                                | Wellness Clinical Research               | 1                                 |
| Cleveland Clinic                              | 0                                 |                                          |                                   |
| North Hills Medical Research                  | 8                                 |                                          |                                   |
| Arlington Family Research Center              | 0                                 |                                          |                                   |
| Randolph Medical Associates                   | 18                                |                                          |                                   |
| Georgia Clinical Research Center, Inc.        | 29                                |                                          |                                   |

eTable 1. Select pre-specified analysis of factors anticipated to impact blood pressure lowering response to lorundrostat in cohort 1

|                                                                          | Body mass index (kg/m <sup>2</sup> )           |                                                  | Use of thiazide-type diuretic                   |                                                  | Race                                           |                                                  |
|--------------------------------------------------------------------------|------------------------------------------------|--------------------------------------------------|-------------------------------------------------|--------------------------------------------------|------------------------------------------------|--------------------------------------------------|
|                                                                          | 25-30                                          | >30                                              | No                                              | Yes                                              | Black or African American                      | Other                                            |
| 50 mg daily dose                                                         |                                                |                                                  |                                                 |                                                  |                                                |                                                  |
| <b>LSM difference with placebo in systolic AOBP change, mmHg (90%CI)</b> | 2.2 (-7.4 to 11.8)<br>P=0.7<br><i>(n=11)</i>   | -16.7 (-25.5 to -7.9)<br>P<0.01<br><i>(n=15)</i> | -4.4 (-14.0 to 5.1)<br>P=0.44<br><i>(n=12)</i>  | -12.9 (-21.2 to -4.7)<br>P=0.01<br><i>(n=16)</i> | -6.9 (-16.9 to 3.2)<br>P=0.26<br><i>(n=8)</i>  | -12.0 (-20.4 to -3.7)<br>P=0.02<br><i>(n=20)</i> |
| 100 mg daily dose                                                        |                                                |                                                  |                                                 |                                                  |                                                |                                                  |
| <b>LSM difference with placebo in systolic AOBP change, mmHg (90%CI)</b> | -4.5 (-14.5 to 5.5)<br>P=0.46<br><i>(n=10)</i> | -12.3 (-21.6 to -3.1)<br>P=0.03<br><i>(n=14)</i> | -5.3 (-15.1 to -4.4)<br>P=0.36<br><i>(n=13)</i> | -10.0 (-18.4 to -1.6)<br>P=0.05<br><i>(n=17)</i> | -7.1 (-15.8 to 1.5)<br>P=0.17<br><i>(n=15)</i> | -9.4 (-18.6 to -0.3)<br>P=0.09<br><i>(n=15)</i>  |

Abbreviations: AOBP – automated office blood pressure, CI – confidence interval, LSM – Least square means.

eTable 2. Change in pharmacodynamic biomarkers compared with baseline

|                                                      | 100 mg daily Cohort 1* (n=30) | 50 mg daily (n=28) | 25 mg BID (n=30) | 12.5 mg BID (n=22) | 12.5 mg daily (n=23) | Placebo Cohort 1*(n=30) | 100mg daily, Cohort 2* (n=31) | Placebo, Cohort 2* (n=6) |
|------------------------------------------------------|-------------------------------|--------------------|------------------|--------------------|----------------------|-------------------------|-------------------------------|--------------------------|
| Baseline serum aldosterone, mean (SD), ng/dL         | 6.57 (3.29)                   | 6.21 (3.83)        | 6.57 (4.37)      | 6.71 (3.43)        | 7.04 (3.75)          | 6.46 (3.39)             | 6.32 (3.47)                   | 5.96 (1.84)              |
| Week 4 serum aldosterone, mean (SD), ng/dL           | 3.97 (4.19)                   | 3.90 (5.27)        | 3.10 (3.25)      | 4.51 (3.75)        | 6.06 (4.62)          | 6.79 (4.77)             | 5.02 (4.84)                   | 5.84 (3.14)              |
| Change in serum aldosterone, mean (SD), ng/dL        | -2.88 (4.44)                  | -2.56 (3.72)       | -3.39 (4.22)     | -2.42 (2.78)       | -1.05 (4.33)         | 0.14 (3.68)             | -1.19 (5.38)                  | -0.11 (3.39)             |
| Baseline plasma renin activity, mean (SD), ng/mL/h   | 0.96 (2.12)                   | 1.26 (3.01)        | 1.10 (2.24)      | 1.30 (1.90)        | 0.95 (1.07)          | 0.54 (0.44)             | 5.42 (7.05)                   | 5.53 (8.66)              |
| Week 4 plasma renin activity, mean (SD), ng/mL/h     | 3.87 (6.31)                   | 3.94 (9.16)        | 2.86 (4.22)      | 5.99 (11.27)       | 1.80 (3.57)          | 0.69 (0.97)             | 12.64 (12.08)                 | 4.10 (2.49)              |
| Change in plasma renin activity, mean (SD), ng/mL/h  | 2.85 (6.27)                   | 2.60 (9.34)        | 1.66 (2.40)      | 4.65 (11.27)       | 0.78 (3.44)          | 0.15 (0.78)             | 7.10 (13.03)                  | -1.43 (7.00)             |
| Baseline morning serum cortisol, mean (SD), ug/dL    | 11.28 (3.55)                  | 10.81 (2.74)       | 10.58 (2.51)     | 10.20 (2.98)       | 9.45 (4.11)          | 10.51 (3.45)            | 11.12 (3.47)                  | 10.51 (2.66)             |
| Week 8 morning serum cortisol, mean (SD), ug/dL      | 16.68 (9.09)                  | 15.66 (7.10)       | 15.53 (8.26)     | 12.32 (7.65)       | 12.52 (8.79)         | 14.20 (8.59)            | 25.40 (6.75)                  | 28.07 (5.40)             |
| Change in morning serum cortisol, mean (SD), ug/dL   | 5.03 (7.63)                   | 4.85 (6.78)        | 4.94 (7.73)      | 1.88 (7.40)        | 3.23 (8.37)          | 3.57 (7.46)             | 14.24 (8.11)                  | 17.55 (7.15)             |
| Baseline eGFR, mean (SD), ml/min/1.73m <sup>2</sup>  | 77.35 (13.95)                 | 77.18 (14.05)      | 80.85 (12.37)    | 81.70 (16.28)      | 77.87 (18.69)        | 81.63 (17.31)           | 79.90 (13.10)                 | 83.92 (18.59)            |
| Week 8 eGFR, mean (SD), ml/min/1.73m <sup>2</sup>    | 68.42 (20.14)                 | 72.54 (16.89)      | 75.11 (14.81)    | 76.32 (19.63)      | 76.00 (21.00)        | 83.83 (17.32)           | 72.42 (16.32)                 | 79.83 (15.78)            |
| Change in eGFR, mean (SD), ml/min/1.73m <sup>2</sup> | -7.83 (11.62)                 | -4.64 (9.87)       | -5.55 (9.22)     | -6.66 (7.92)       | -3.67 (8.10)         | 0.95 (7.06)             | -7.95 (9.13)                  | -4.08 (3.94)             |

\*Cohort 1 = plasma renin activity ≤ 1.0 ng/mL/h, Cohort 2 = plasma renin activity >1.0 ng/mL/h. Abbreviations: BID – twice daily, eGFR – estimated glomerular filtration rate, SD-standard deviation

eTable 3. Observed 24-hour ambulatory blood pressure changes among all cohort 1 participants

|                                                                                 | <b>Placebo<br/>(n=26)</b> | <b>12.5 mg BID<br/>(n=16)</b> | <b>25 mg BID<br/>(n=26)</b> | <b>12.5 mg daily<br/>(n=15)</b> | <b>50 mg daily<br/>(n=28)</b> | <b>100 mg daily<br/>Cohort 1 (n=24)</b> |
|---------------------------------------------------------------------------------|---------------------------|-------------------------------|-----------------------------|---------------------------------|-------------------------------|-----------------------------------------|
| Mean 24-hour ABPM, Baseline to End of Treatment                                 |                           |                               |                             |                                 |                               |                                         |
| <b>Mean (SE) change<br/>in SBP, mmHg</b>                                        | -0.8 (2.1)                | -5.7 (3.2)                    | -8.7 (3.1)                  | -5.2 (4.3)                      | -1.8 (3.0)                    | -8.9 (2.4)                              |
| Mean 24-hour Central Blood Pressure Assessed by Pulse Wave Velocity during ABPM |                           |                               |                             |                                 |                               |                                         |
| <b>Mean (SE) change<br/>in SBP, mmHg</b>                                        | -0.6 (2.2)                | -8.0 (4.7)                    | -10.6 (3.5)                 | 0.6 (5.6)                       | -4.3 (3.1)                    | -11.0 (2.8)                             |
| Mean Overnight ABPM, Baseline to End of Treatment                               |                           |                               |                             |                                 |                               |                                         |
| <b>Mean (SE) change<br/>in SBP, mmHg</b>                                        | -3.5 (2.5)                | -7.5 (4.0)                    | -6.0 (3.1)                  | -5.4 (5.4)                      | 2.4 (4.8)                     | -11.5 (2.9)                             |

Abbreviations: ABPM – ambulatory blood pressure monitoring, BID – twice daily, LSM - Least-square means, SBP – systolic blood pressure, SE – standard error

eTable 4. Observed 24-hour ambulatory blood pressure changes among cohort 1 participants with baseline 24-hour mean systolic blood pressure > 130 mm Hg

|                                                                                                               | <b>Placebo<br/>(n=20)</b> | <b>12.5 mg BID<br/>(n=12)</b> | <b>25 mg BID<br/>(n=19)</b> | <b>12.5 mg daily<br/>(n=14)</b> | <b>50 mg daily (n=14)</b> | <b>100 mg daily<br/>Cohort 1 (n=21)</b> |
|---------------------------------------------------------------------------------------------------------------|---------------------------|-------------------------------|-----------------------------|---------------------------------|---------------------------|-----------------------------------------|
| Mean 24-hour ABPM, Baseline to End of Treatment                                                               |                           |                               |                             |                                 |                           |                                         |
| <b>Mean (SE) change<br/>in SBP, mmHg</b>                                                                      | -2.1 (2.3)                | -7.1 (4.0)                    | -12.1 (3.8)                 | -5.6 (4.6)                      | -7.5 (4.7)                | -9.9 (2.7)                              |
| Mean 24-hour Central Blood Pressure Assessed by Pulse Wave Velocity during ABPM, Baseline to End of Treatment |                           |                               |                             |                                 |                           |                                         |
| <b>Mean (SE) change<br/>in SBP, mmHg</b>                                                                      | -1.4 (2.5)                | -7.4 (5.2)                    | -13.1 (4.1)                 | -0.6 (6.2)                      | -10.8 (2.7)               | -12.9 (2.8)                             |
| Mean Overnight ABPM, Baseline to End of Treatment                                                             |                           |                               |                             |                                 |                           |                                         |
| <b>Mean (SE) change<br/>in SBP, mmHg</b>                                                                      | -3.9 (2.3)                | -6.4 (5.1)                    | -9.6 (4.0)                  | -5.6 (5.9)                      | -0.1 (6.8)                | -12.3 (3.2)                             |

Abbreviations: ABPM – ambulatory blood pressure monitoring, BID – twice daily, SBP – systolic blood pressure, SD – standard deviation

eFigure 1. Study design schema

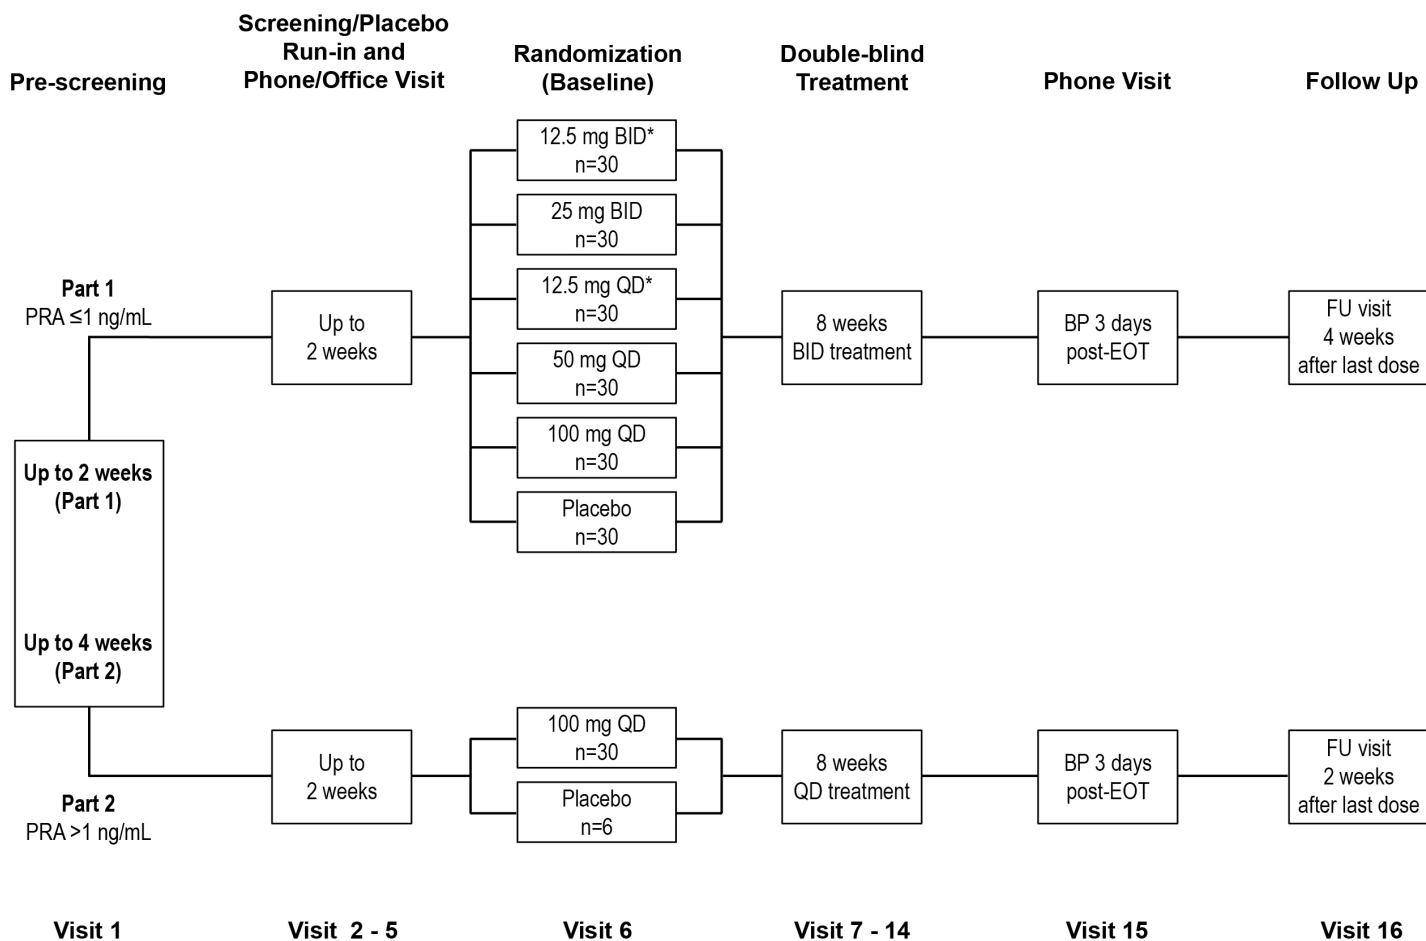

\* - Randomization to the 12.5 mg daily and twice daily was stopped following interim analysis due to sub-maximal efficacy

Abbreviations: BID – twice daily, BP – blood pressure, EOT- end of treatment, FU – follow-up, PRA – plasma renin activity, QD –daily

eFigure 2. Weekly automated office systolic blood pressure changes with lorundrostat

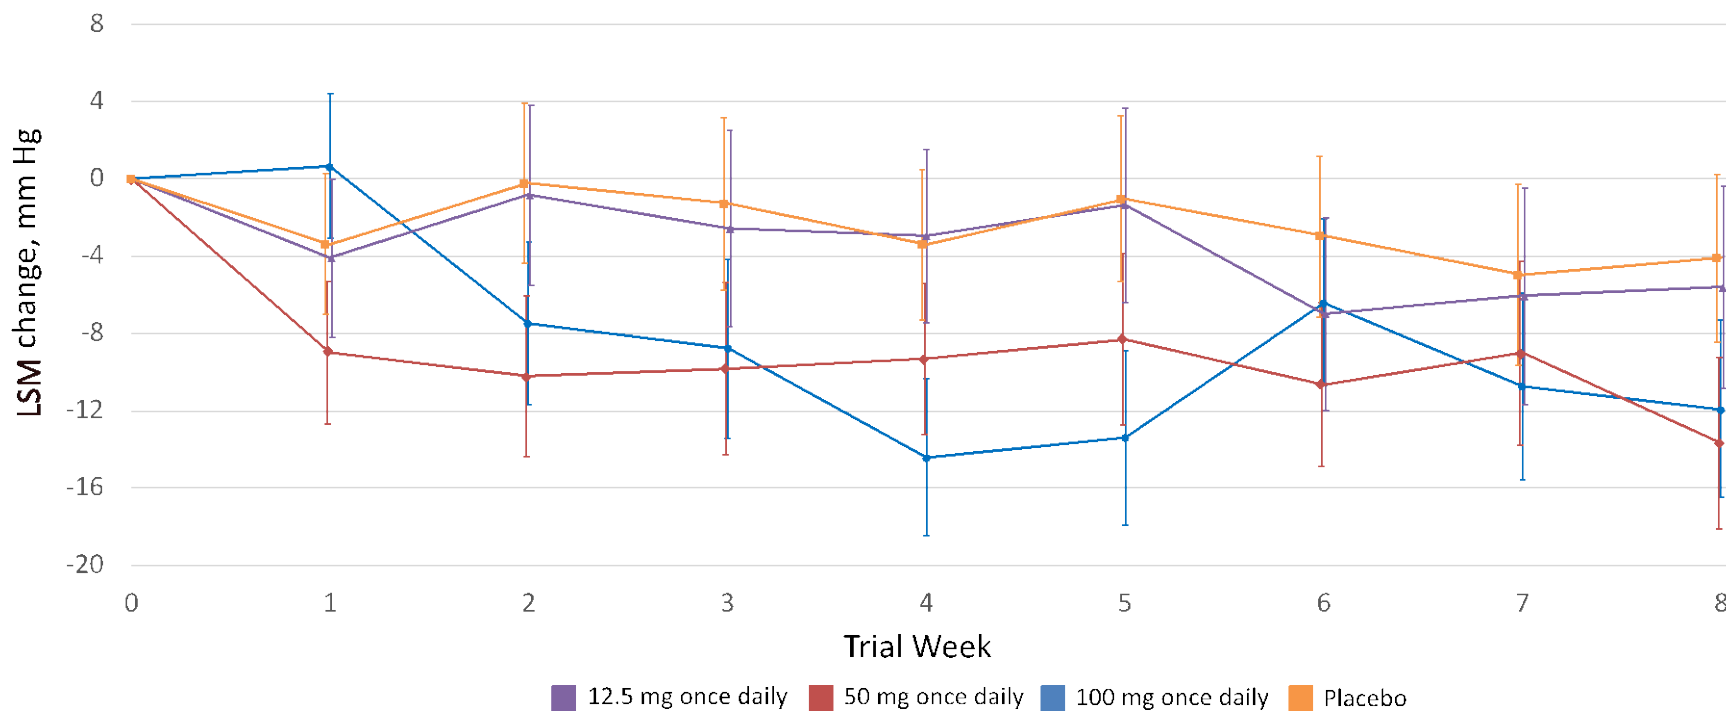

Weekly least-squares mean (LSM) change in systolic automated office blood pressure from baseline among participants taking once daily lorundrostat or placebo in cohort 1. Error bars represent 90% confidence intervals.



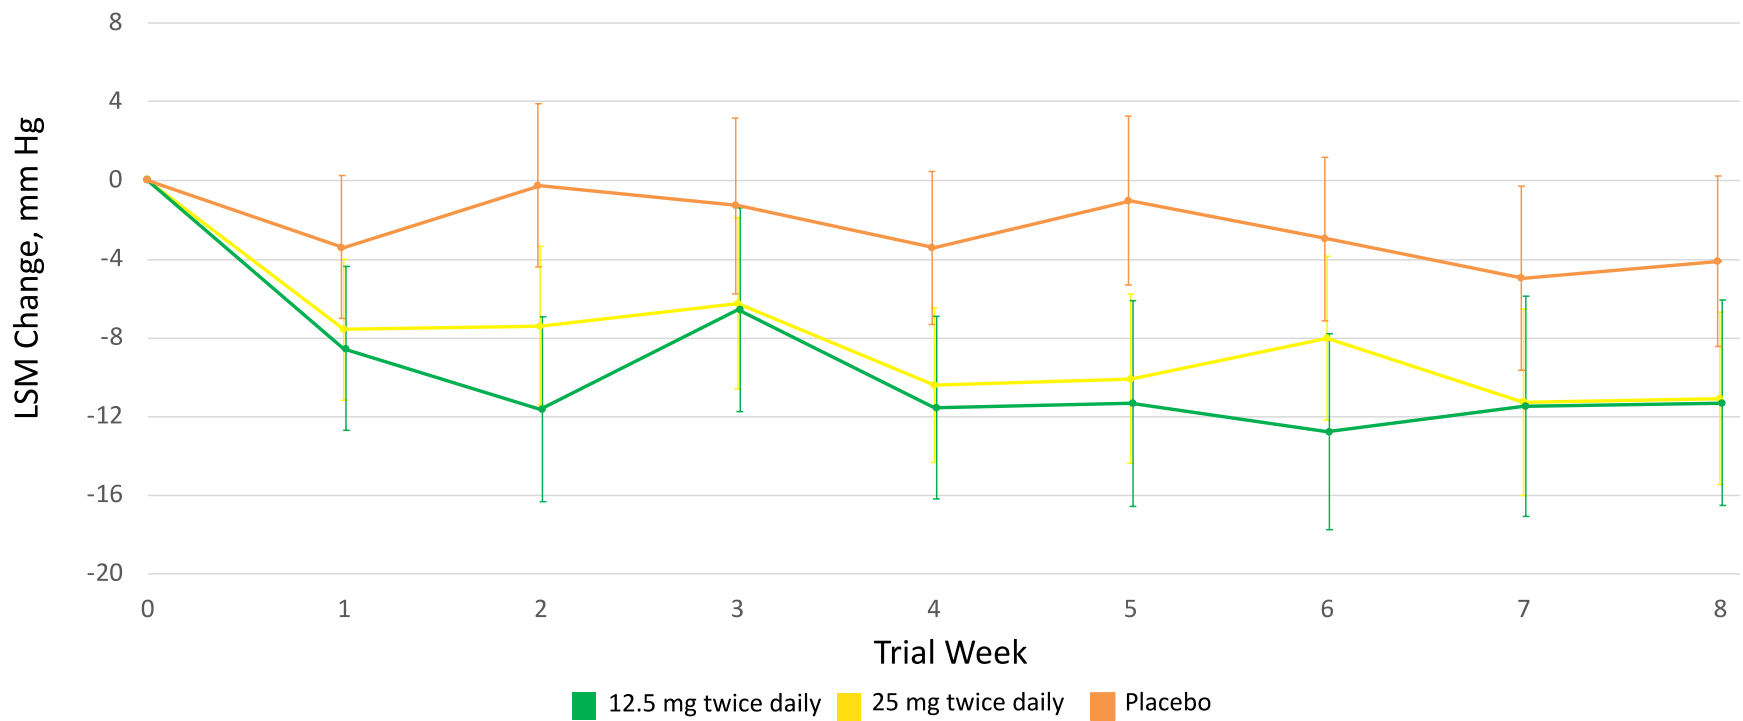

Weekly least-squares mean (LSM) change in systolic automated office blood pressure from baseline among participants taking twice daily lorundrostat or placebo in cohort 1. Error bars represent 90% confidence intervals.

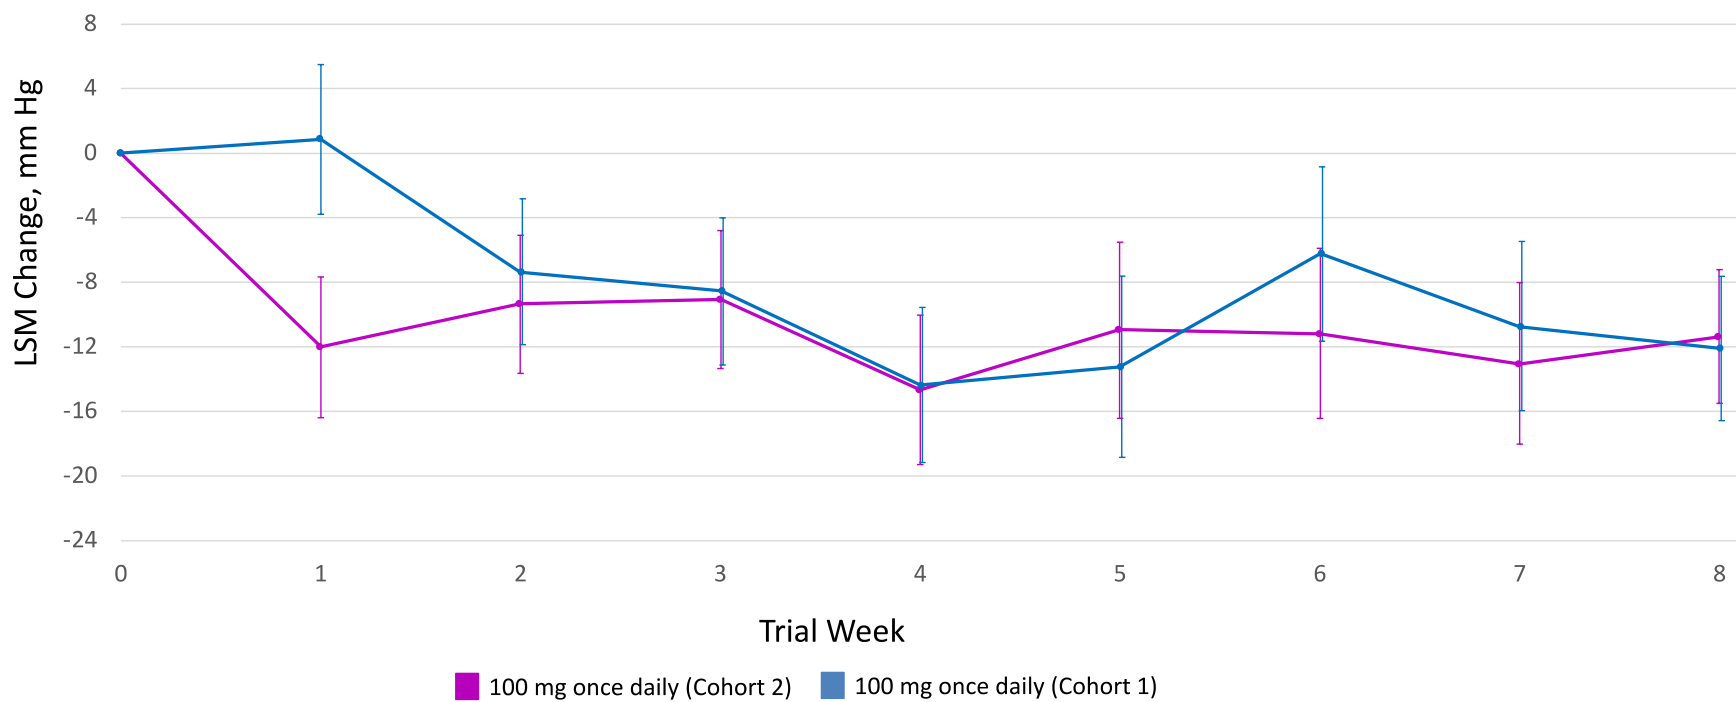

Weekly least-squares mean (LSM) change in systolic automated office blood pressure from baseline among participants taking 100 mg once daily lorundrostat in cohort 2 (plasma renin activity >1.0 ng/mL/h) compared with 100 mg once daily lorundrostat in cohort 1 (plasma renin activity ≤ 1.0 ng/mL/h) in cohort 1. Error bars represent 90% confidence intervals.

eFigure 3. Proportion of participants with automated office blood pressure < 130/80 mmHg at week 8 compared with baseline among cohort 1 participants

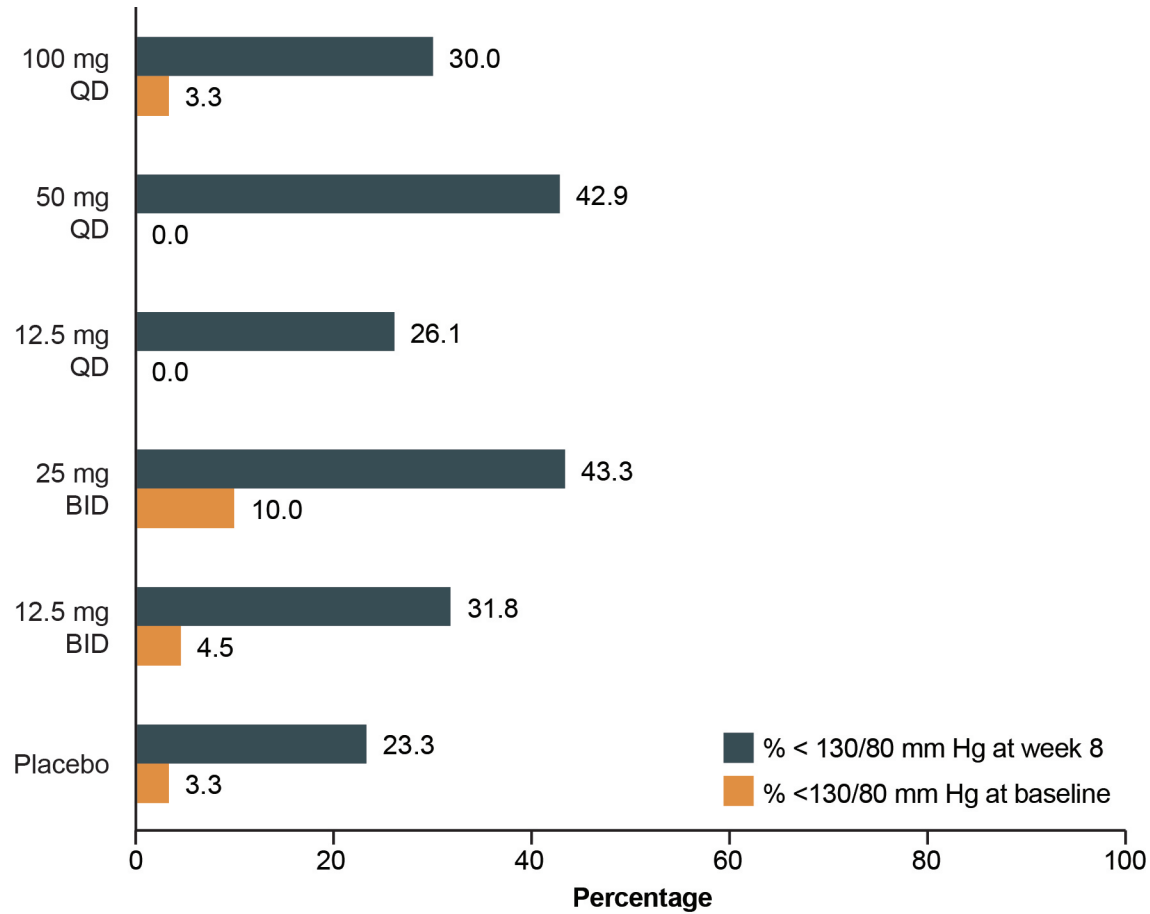

Abbreviations: BID – twice daily, QD - daily

eFigure 4. Cosyntropin-stimulated cortisol production after 8 weeks of lorundrostat treatment

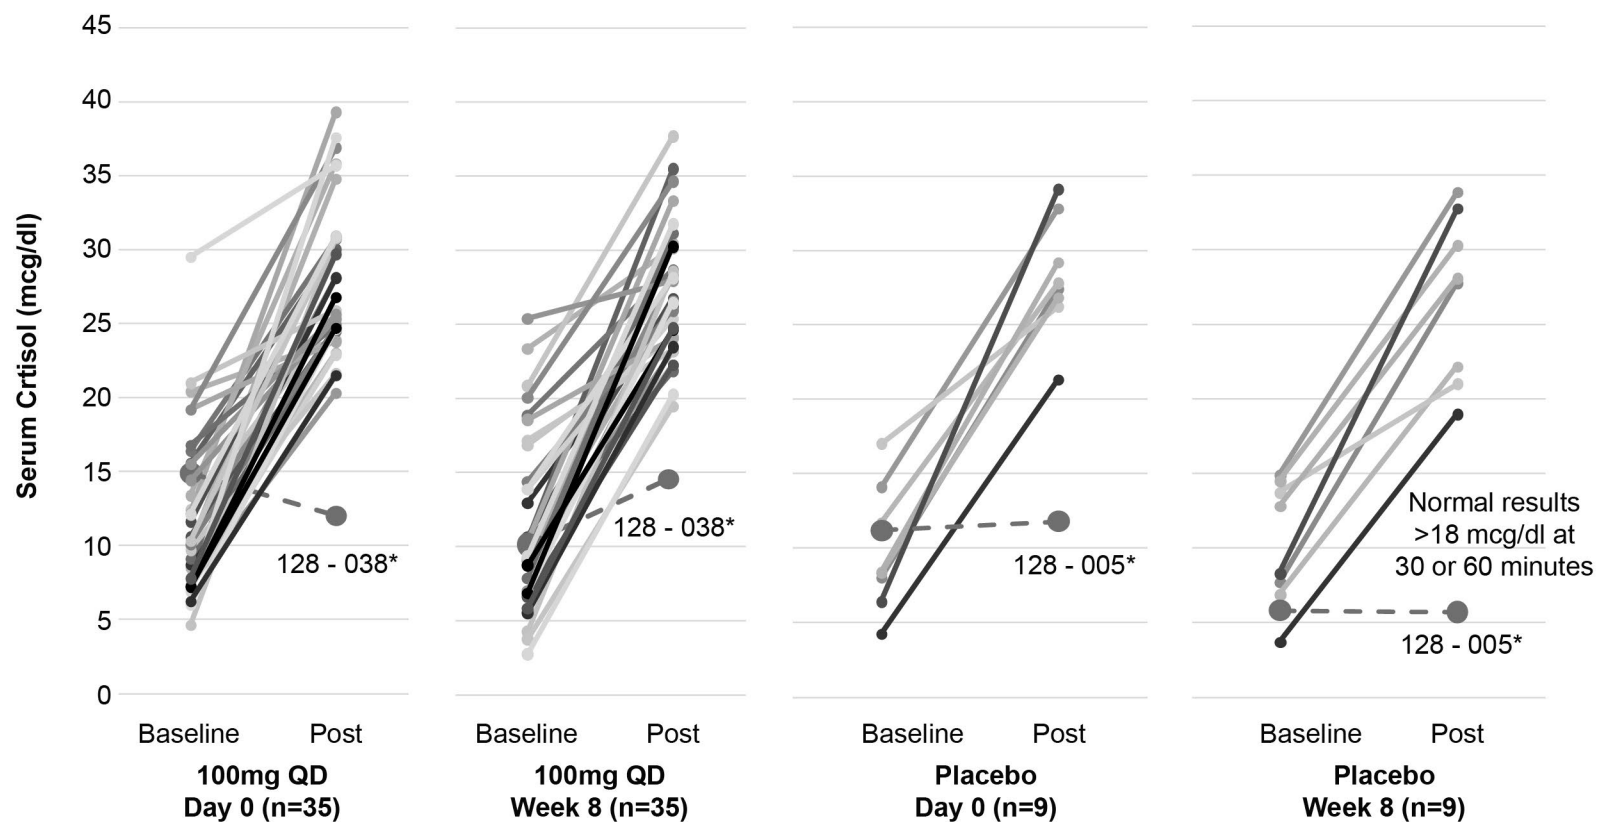

COVID-19 necessitated supply chain shortages in cosyntropin did not allow all trial participants to undergo ACTH stimulation testing.

\*Participants at study site 128 did not receive proper administration of cosyntropin

Abbreviations: QD –daily
