# Supplementary material
Source: PubMed Central journal article supplement (PMC10493865)
Supplement: jama-e2316029-s004.pdf [file jama-e2316029-s004.pdf]

Supplemental Online Content: Nonauthor Collaborators

\*First name, last name, and suffix (if applicable) are required and will appear in PubMed.

| <b>*Group Name(s): Target-HTN Investigators</b> |                   |                              |                                               |                                          |                                                         |                                                                                            |
|-------------------------------------------------|-------------------|------------------------------|-----------------------------------------------|------------------------------------------|---------------------------------------------------------|--------------------------------------------------------------------------------------------|
| <b>*First Name and Middle Initial(s)</b>        | <b>*Last Name</b> | <b>*Suffix (eg, Jr, III)</b> | Institution                                   | Location (city, state/province, country) | Role or Contribution, eg, chair, principal investigator | Group (if more than 1 Group listed in the byline) and/or Subgroup (eg, Steering Committee) |
| Richard                                         | Beasley           |                              | RC Health Concepts                            | Rapid City, SD, USA                      | Site Investigator                                       |                                                                                            |
| Matthew                                         | Budoff            |                              | Lundquist Institute                           | Torrance, CA, USA                        | Site Investigator                                       |                                                                                            |
| George                                          | Carr              |                              | Jefferson City Medical Group                  | Jefferson City, MO, USA                  | Site Investigator                                       |                                                                                            |
| Michael                                         | Carroll           |                              | PRX Research                                  | Mesquite, TX, USA                        | Site Investigator                                       |                                                                                            |
| Jose                                            | Cevallos Yopez    |                              | Finlay Medical Research Corp                  | Greenacres, FL, USA                      | Site Investigator                                       |                                                                                            |
| Anil                                            | Chhabra           |                              | Grace Research                                | Shreveport, LA, USA                      | Site Investigator                                       |                                                                                            |
| Frank                                           | Cole              |                              | Javara Research                               | Fayetteville, GA, USA                    | Site Investigator                                       |                                                                                            |
| Leonard                                         | Dunn              |                              | Clinical Research of West Florida - Corporate | Clearwater, FL, USA                      | Site Investigator                                       |                                                                                            |
| William                                         | Eaves             |                              | Grace Research                                | Bossier City, LA, USA                    | Site Investigator                                       |                                                                                            |
| Valentine                                       | Ebuh              |                              | WR-Global Medical Research                    | Dallas, TX, USA                          | Site Investigator                                       |                                                                                            |
| Roger                                           | Estevez           |                              | Clinical Research of South Nevada             | Pembroke Pines, FL, USA                  | Site Investigator                                       |                                                                                            |
| Glenn                                           | Gould             |                              | Burke Primary Care                            | Morganton, NC, USA                       | Site Investigator                                       |                                                                                            |
| Matthew                                         | Hong              |                              | M3 Wake Research, Inc.                        | Raleigh, NC, USA                         | Site Investigator                                       |                                                                                            |
| Bruce                                           | Iteld             |                              | Louisiana Heart Center                        | Slidell, LA, USA                         | Site Investigator                                       |                                                                                            |
| Mahendra                                        | Jain              |                              | Houston Methodist Hospital                    | Pearland, TX, USA                        | Site Investigator                                       |                                                                                            |
| Charles                                         | Kemp              |                              | Javara - Privia Medical Group Georgia         | Albany, GA, USA                          | Site Investigator                                       |                                                                                            |
| Christina                                       | Kennelly          |                              | Javara Inc.                                   | Charlotte, NC, USA                       | Site Investigator                                       |                                                                                            |
| Mark                                            | Kleiner           |                              | Javara Inc.                                   | Forest, VA, USA                          | Site Investigator                                       |                                                                                            |
| Mark                                            | Kutner            |                              | Suncoast Research Group, LLC                  | Miami, FL, USA                           | Site Investigator                                       |                                                                                            |
| Luke                                            | Laffin            |                              | Cleveland Clinic                              | Cleveland, OH, USA                       | Site Investigator                                       |                                                                                            |
| Joseph                                          | Lambert           |                              | North Hills Medical Research                  | North Richland Hills                     | Site Investigator                                       |                                                                                            |
| Gilbert                                         | Ledesma           |                              | Arlington Family Research Center              | Arlington, TX, USA                       | Site Investigator                                       |                                                                                            |
| Keung                                           | Lee               |                              | Randolph Medical Associates                   | Asheboro, NC, USA                        | Site Investigator                                       |                                                                                            |
| John                                            | Lentz             |                              | Georgia Clinical Research Center, Inc.        | Lawrenceville, GA, USA                   | Site Investigator                                       |                                                                                            |
| Steven                                          | Lupovitch         |                              | Northwest Heart Clinical Research             | Arlington Heights, IL, USA               | Site Investigator                                       |                                                                                            |
| James                                           | Luther            |                              | Vanderbilt                                    | Nashville, TN, USA                       | Site Investigator                                       |                                                                                            |
| Lon                                             | Lynn              |                              | Clinical Research of West Florida, Inc.       | Tampa, FL, USA                           | Site Investigator                                       |                                                                                            |
| Obadias                                         | Marquez           |                              | WR-ClinSearch                                 | Chattanooga, TN, USA                     | Site Investigator                                       |                                                                                            |
| Mobeen                                          | Mazhar            |                              | Ace Clinical Research Group                   | Houston, TX, USA                         | Site Investigator                                       |                                                                                            |

## Supplemental Online Content: Nonauthor Collaborators

\*First name, last name, and suffix (if applicable) are required and will appear in PubMed.

| *First Name and Middle Initial(s) | *Last Name      | *Suffix (eg, Jr, III) | Institution                              | Location (city, state/province, country) | Role or Contribution, eg, chair, principal investigator | Group (if more than 1 Group listed in the byline) and/or Subgroup (eg, Steering Committee) |
|-----------------------------------|-----------------|-----------------------|------------------------------------------|------------------------------------------|---------------------------------------------------------|--------------------------------------------------------------------------------------------|
| David                             | Morin           |                       | Holston Medical Group, P.C.              | Kingsport, TN, USA                       | Site Investigator                                       |                                                                                            |
| Joel                              | Neutel          |                       | Orange County Research Center, Inc.      | Tustin, CA, USA                          | Site Investigator                                       |                                                                                            |
| Yaa                               | Oppong          |                       | Carolina Institute for Clinical Research | Fayetteville, NC, USA                    | Site Investigator                                       |                                                                                            |
| Merlin                            | Osorio          |                       | Next Phase Research                      | Miami, FL, USA                           | Site Investigator                                       |                                                                                            |
| Andres                            | Patron          |                       | Andres Patron                            | Pembroke Pines, FL, USA                  | Site Investigator                                       |                                                                                            |
| Walter                            | Pharr           |                       | Medication Management, LLC               | Greensboro, NC, USA                      | Site Investigator                                       |                                                                                            |
| Mercedes                          | Ponce de Leon   |                       | Vitae Research Center                    | Miami, FL, USA                           | Site Investigator                                       |                                                                                            |
| Lilia                             | Rodriguez-Ables |                       | Finlay Medical Research Corp             | Miami, FL, USA                           | Site Investigator                                       |                                                                                            |
| Jeffrey                           | Rosen           |                       | AMR Coral Gables/Miami                   | Coral Gables, FL, USA                    | Site Investigator                                       |                                                                                            |
| Issac                             | Sachmechi       |                       | Queens Hospital Medical Center           | Jamaica, NY, USA                         | Site Investigator                                       |                                                                                            |
| Ronald                            | Surowitz        |                       | Health Awareness, Inc.                   | Jupiter, FL, USA                         | Site Investigator                                       |                                                                                            |
| Larkin                            | Wadsworth       |                       | Sundance Clinical Research               | St. Louis, MO, USA                       | Site Investigator                                       |                                                                                            |
| Jeffrey                           | Wayne           |                       | Clinical Trials Research                 | Lincoln, CA, USA                         | Site Investigator                                       |                                                                                            |
| Zahid                             | Zafar           |                       | Wellness Clinical Research               | McKinney, TX, USA                        | Site Investigator                                       |                                                                                            |
